# Supplementary material for: Sipha maydis sensitivity to defences of Lolium multiflorum and its endophytic fungus Epichloë occultans
Source: PeerJ. 2019 Dec 18;7:e8257. doi: 10.7717/peerj.8257 (PMC6966988; doi:10.7717/peerj.8257)
Supplement: Table S1 — Plant: Lolium multiflorum; fungal endophyte: Epichloë occultans; aphid: Sipha maydis. [file peerj-07-8257-s001.xlsx]

## Sheet: All
Table S1: All data obtained in the present study. Plant: Lolium multiflorum; fungal endophyte: Epichloë occultans; aphid: Sipha maydis.
Plant ID	Plant symbiotic status	Salicylic acid (SA) application	Plant SA conc day 3 (ng g-1 DW)	Plant jasmonic acid conc day 3 (ng g-1 DW)	Plant total lolines day 10 (µg g-1 DW)	Plant N-acetylnorloline day 10 (µg g-1 DW)	Plant N-formylloline day 10 (µg g-1 DW)	Plant tillers number day 1	Above-ground plant biomass day 27 (g DW)	Aphids number day 10	Aphids number day 17	Aphid standard metabolic rate (SMR) day 27 (µL VCO2 h-1)	Grouped aphid body mass (n = 35 individuals) (mg)
142	E-	SA-	159	602	-	-	-	49	3.59	13	19
114	E-	SA-	104	391	-	-	-	45	4.01	17	39
148	E-	SA-	105	661	-	-	-	43	6.67	7	1
174	E-	SA-	100	1841	-	-	-	40	3.08	4	24	16.7142	3.9
194	E-	SA-	123	903	-	-	-	41	3.56	3	1
190	E-	SA-	150	1956	-	-	-	52	5.14	1	19
102	E-	SA-	102	717	-	-	-	49	2.11	2	2
122	E-	SA-	171	967	-	-	-	37	2.81	2	4
192	E-	SA-						62	4.81	6	17	18.0338	7.2
110	E-	SA-						58	3.79	2	13
118	E-	SA-						52	4.1	10	2
184	E-	SA-						48	4.35	5	22	6.15787	8.1
176	E-	SA-						36	2.62	7	38	14.515	9.4
126	E-	SA-						35	3.46	4	12	16.7142	3.9
113	E+	SA-	79	529	878.046	236.033	642.013	46	5.05	3	10
11	E+	SA-	105	482	475.913	105.674	370.239	55	4.2	3	48
137	E+	SA-	115	708	571.552	132.871	438.681	44	5.12	4	34	24.6315	9
179	E+	SA-	96	931	367.989	61.832	306.157	36	5.55	1	3
159	E+	SA-	137	433	273.275	53.453	219.822	35	2.8	2	18
131	E+	SA-	69	528	122.843	14.64	108.203	54	4.38	2	14
149	E+	SA-	114	1091	1715.57	559.341	1156.22	43	4.23	4	5	20.5849	6.4
201	E+	SA-	76	789	134.414	28.803	105.611	73	3.29	16	17	23.3119	9.1
109	E+	SA-						73	6.06	12	30
171	E+	SA-						51	2.89	3	8
107	E+	SA-						44	4.76	2	13	20.233	5.2
167	E+	SA-						43	4.7	3	1
147	E+	SA-						42	10.82	5	7
129	E+	SA-						42	7.61	4	8	12.2278	6.6
162	E-	SA+	2442	567	-	-	-	68	5.76	6	15	8.53305	6.4
130	E-	SA+	2028	424	-	-	-	63	7.91	1	12
146	E-	SA+	1898	419	-	-	-	34	2.31	18	30
22	E-	SA+	1667	968	-	-	-	36	4.08	1	38
154	E-	SA+	2098	469	-	-	-	53	5.56	3	18	28.854	12.8
128	E-	SA+	2580	1570	-	-	-	54	3.95	11	48
186	E-	SA+	2599	1319	-	-	-	25	3.32	16	16
196	E-	SA+	1497	1769	-	-	-	48	2.92	7	32
150	E-	SA+						56	5.82	10	25	22.9601	5.2
152	E-	SA+						49	5.53	2	5
134	E-	SA+						45	7.19	12	13	25.0713	6.8
188	E-	SA+						34	4.43	13	12	12.6676	4.5
201	E-	SA+						55	5.92	6	13
163	E-	SA+						34	5.12	4	13
191	E+	SA+	2404	828	252.672	47.573	205.099	47	2.79	7	1	16.7142	4.6
115	E+	SA+	1871	973	611.951	141.593	470.358	57	4.42	1	8
165	E+	SA+	2527	761	604.524	189.316	415.208	49	4.57	2	6	14.9548	4.1
189	E+	SA+	2045	551	570.597	200.4	370.197	41	7.6	12	49
103	E+	SA+	1163	489	505.927	104.109	401.818	49	4.25	11	22
153	E+	SA+	1878	912	669.921	161.27	508.651	41	3.84	1	0
173	E+	SA+	2014	759	1091.41	261.975	829.437	61	3.17	5	8
175	E+	SA+	1531	913	1073.51	220.819	852.691	31	5.31	1	0
89	E+	SA+						69	2.02	2	0
199	E+	SA+						68	6.51	2	5
105	E+	SA+						55	7.93	9	22
169	E+	SA+						52	3.72	13	28	32.9886	9.8
143	E+	SA+						42	8.85	4	9	18.4736	6.6
187	E+	SA+						27	3.43	5	14	28.1503	6.8
